# Supplementary material for: A novel mutation tolerant padlock probe design for multiplexed detection of hypervariable RNA viruses
Source: PubMed Central journal article supplement (PMC6393471; doi:10.1038/s41598-019-39854-3), 2019-02-27
Supplement: 41598_2019_39854_MOESM1_ESM.pdf [file 41598_2019_39854_MOESM1_ESM.pdf]

# A novel mutation tolerant padlock probe design for multiplexed detection of hypervariable RNA viruses

Sibel Ciftci<sup>1</sup>, Felix Neumann<sup>1</sup>, Iván Hernández-Neuta<sup>1</sup>, Mikhayil Hakhverdyan<sup>2</sup>, Ádám Bálint<sup>3</sup>, David Herthnek<sup>1</sup>, Narayanan Madaboosi<sup>1\*</sup>, Mats Nilsson<sup>1\*</sup>

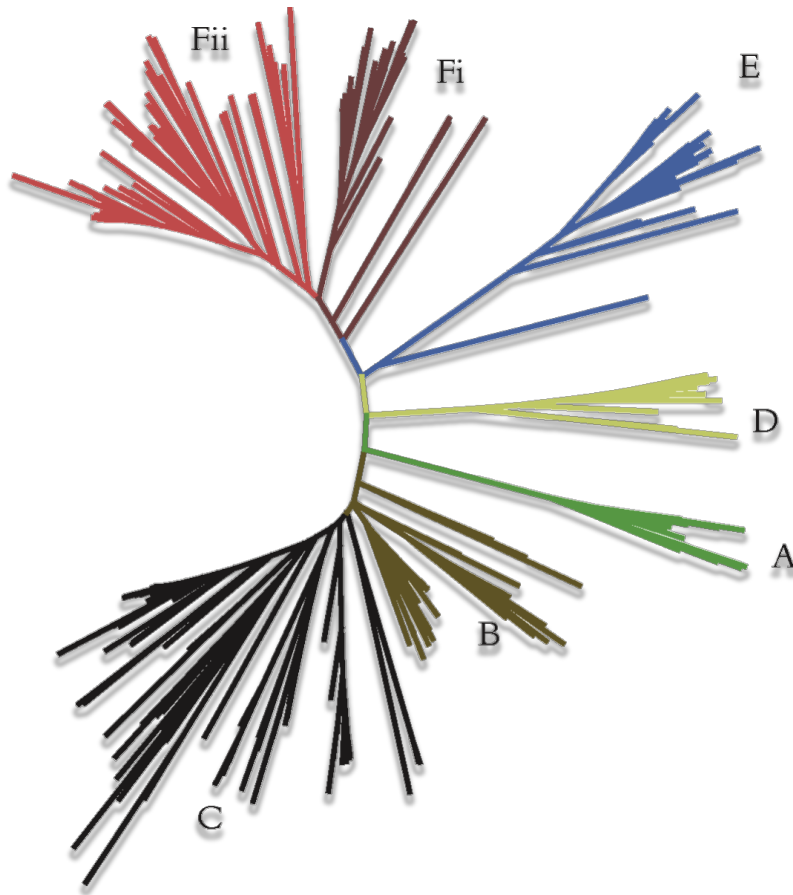

**SI, Fig. S1:** Phylogenetic tree construction over N-gene of IBV, and its groups (A, B, C, D, E, Fi, Fii).



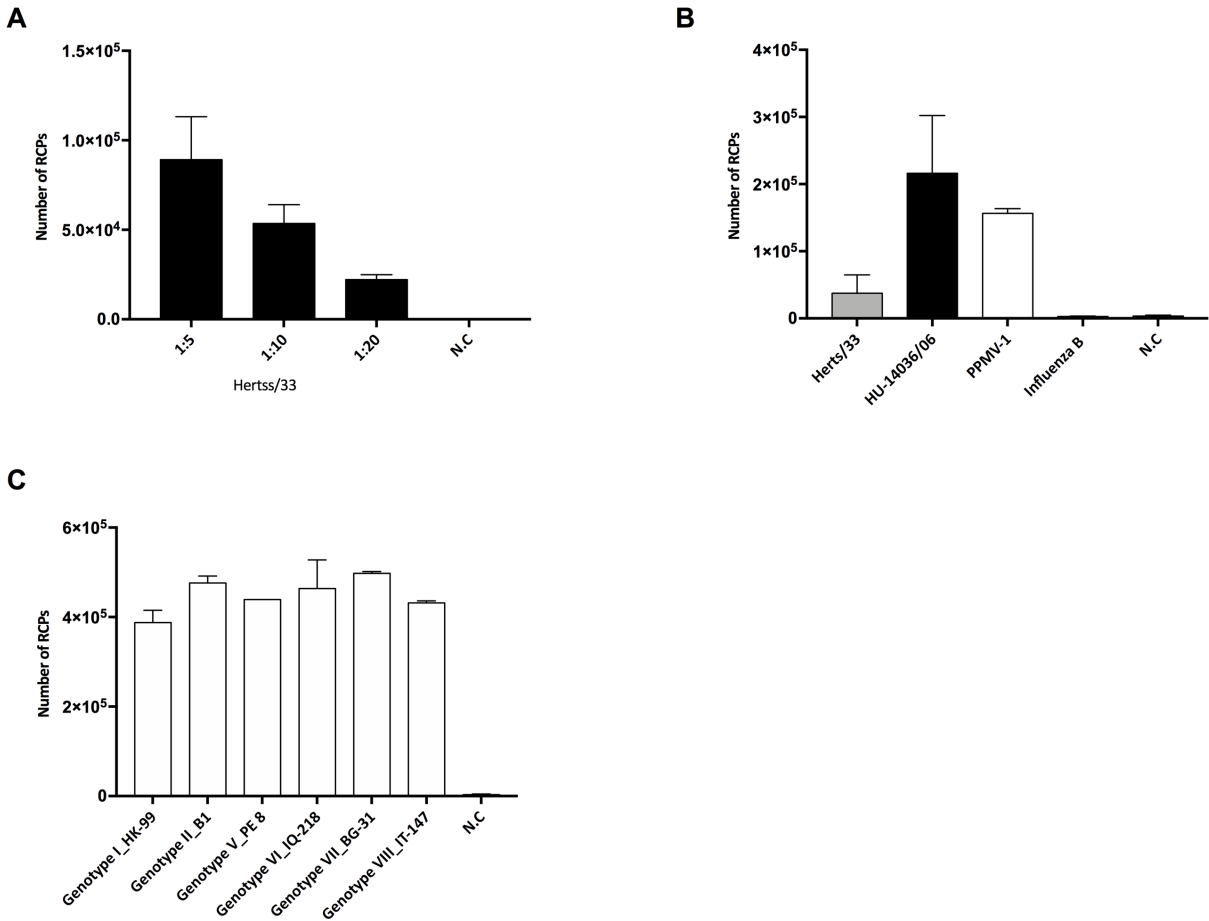

**SI, Fig. S3:** Optimization of RT-C2CA experiments. **A.** Different concentrations of cDNA from Herts/33 synthesized using SP (B1) and amplified using PLP (B1). **B.** 1:40 dilution of cDNA from different strains (along with Influenza B virus as specificity control), synthesized using RP and amplified using cocktail PLP. **C.** 1:10 dilution of cDNA from different strains, synthesized and amplified as in **B.**

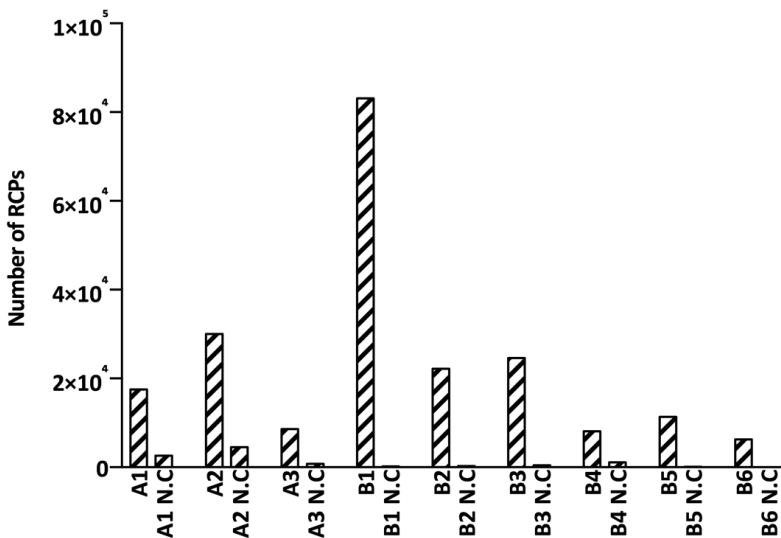

**SI, Fig. S4:** PLP validation by RT-C2CA assay on their respected synthetic targets (100 fM) along with their negative controls (water instead of synthetic target).

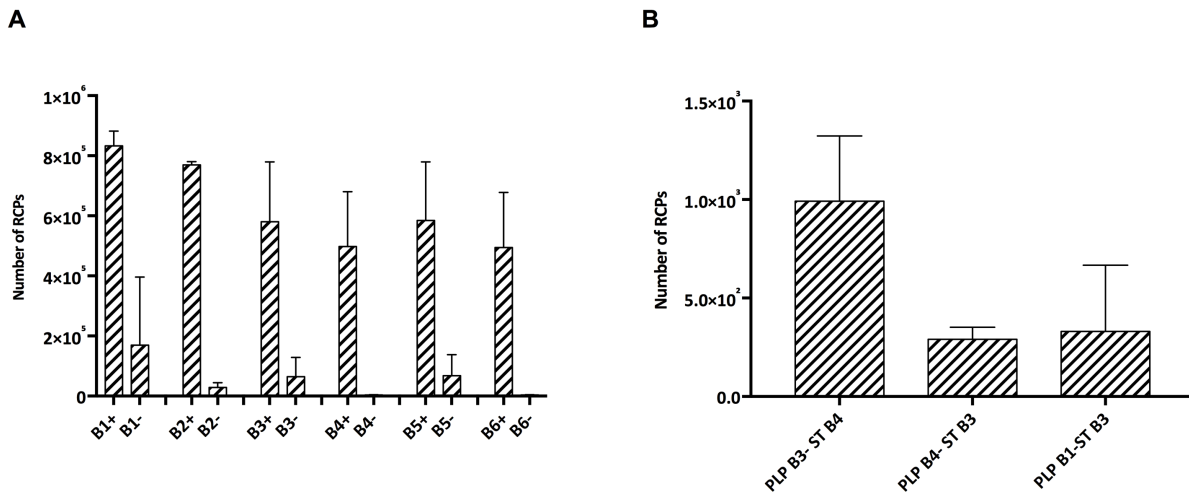

**SI, Fig. S5:** RT-C2CA assay performed using synthetic targets (ST) at a concentration of 100 fM and cocktail PLP for the specific performance of the PLPs used. **A.** Use of specific PLPs, alongside showing the results after the elimination of the respective PLP from the cocktail (e.g., B1+ uses cocktail PLP for detecting B1 synthetic target; B1- has elimination of B1 PLP from the cocktail). **B.** Cross-reactivity of PLPs on synthetic targets.

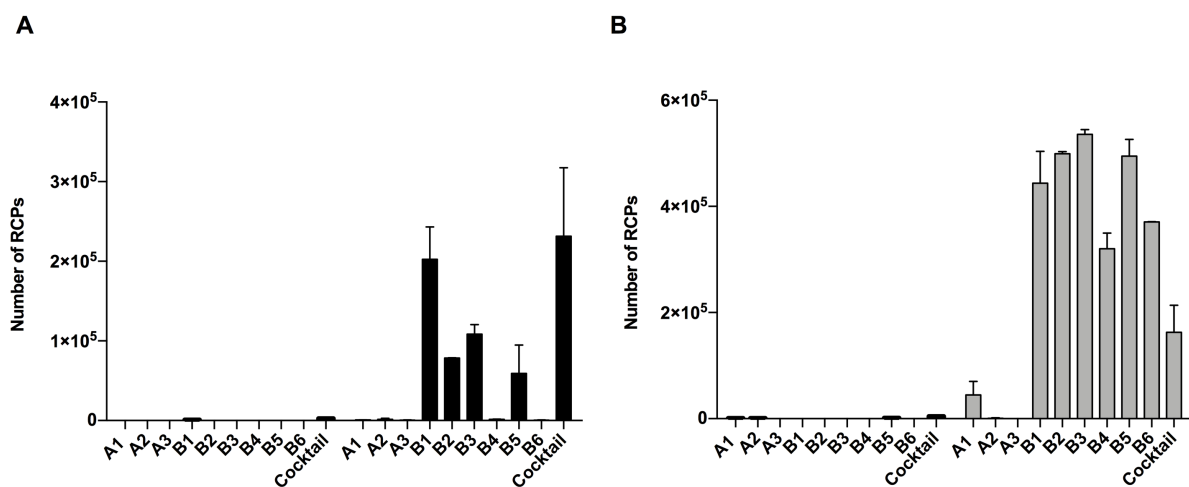

**SI, Fig. S6** Performance of individual and cocktail PLPs for C2CA validation using **A.** Herts/33 and **B.** HU-14036/06, along with their respective negative controls (water instead of template). cDNA (dilution of 1:20) synthesized by SP (B1 for Herts/33 and B3 for HU-14036/06) + RP was used.

## SI, ST1. Synthetic targets used in this study

| Name   | 5' modification | Sequence                                 |
|--------|-----------------|------------------------------------------|
| NDV.A1 | Biotin          | TGCGAGAGGGGGWATTGAGGGGCTTTGCCAGAA        |
| NDV.A2 | Biotin          | AAGACAGAGAGACTATCAGRTCAGATACTTTCTTCATCTA |
| NDV.A3 | Biotin          | TATATCGAGTGTCTCCATATGTCCATATATCAAATGACT  |
| NDV.B1 | Biotin          | CAGGGAAATGGGGTCATTCARGATAGCATATCCTT      |
| NDV.B2 | Biotin          | TGCAAAAGTATTGTCTTAAYTGGAGATATCAGACAGTCAA |
| NDV.B3 | Biotin          | GTGAAAACACTGTAATGTCYGTGTGCCAACATTGCATC   |
| NDV.B4 | Biotin          | AGATTATGCCCGGAAYAGAAGCTGGTCACCTTTGACAGG  |
| NDV.B5 | Biotin          | CACCTTACATTACATATCYAATGATTTCYCAAAGGCTATT |
| NDV.B6 | Biotin          | TGACTCGTGCTCAACAAAAATTSTAYATGAAAACCATAGG |

## SI, ST2. Table of oligonucleotides used for other avian viruses

| Name       | 5' modification | Sequence                                                                                   |
|------------|-----------------|--------------------------------------------------------------------------------------------|
| ILTV_PLP.1 | Phosphate       | GAAGGATTGATTTCTGGAACGTGTATGCAGCTCCTCAGTAATAGTGTCTTACCGCCAACGTGAGCATCGTATAATAGCGTCTGGTCGATT |
| ILTV_PLP.2 | Phosphate       | CGACGTAAGAAGTACAACGTGTATGCAGCTCCTCAGTAATAGTGTCTTACCGCCAACGTGAGCATCGTATACTCCGAATGGCCCGT     |
| IBDV_PLP.1 | Phosphate       | GTCAAATTGTAGTTCGAGGTGTGTATGCAGCTCCTCAGTAATAGTGTCTTACCCTCCGAGTGGTCACGAATACCCTGTGTCCCCACA    |
| IBDV_PLP.2 | Phosphate       | CCACAGTCAAATTTGAGGTGTGTATGCAGCTCCTCAGTAATAGTGTCTTACCCTCCGACTGGTCAGGTATACCTGACCCCTGTGTCCC   |
| IBDV_PLP.3 | Phosphate       | CACTCAGTATCAATTTGTGGTGTATGCAGCTCCTCAGTAATAGTGTCTTACCCTCCGACTGGTCAGGTATAGCCAAGACGGTCCCTCT   |
| IBDV_PLP.4 | Phosphate       | TTCTTGACGCGGCTCGGTGTATGCAGCTCCTCAGTAATAGTGTCTTACCCTCCGACTGGTCAGGTATAGTATGCAACCCGGCTCT      |
| IBDV_PLP.5 | Phosphate       | TCTCTGCATGCACGTAGTGTGTATGCAGCTCCTCAGTAATAGTGTCTTACCCTCCGACTGGTCAGGTATAGTATGCAACCCGGCTCT    |
| IBV_PLP.1  | Phosphate       | CACCTGGTGAATGAACCTGTGTATGCAGCTCCTCAGTAATAGTGTCTTACCCTGCCGTGTGTGAGATAGATTAATGGGGTATTGATCAG  |
| IBV_PLP.2  | Phosphate       | AAAGCATTGACCTCAGATGAGTGTATGCAGCTCCTCAGTAATAGTGTCTTACCCTGCCGTGTGTGAGATAGCAGGATGATGAAGTRGAT  |
| IBV_PLP.3  | Phosphate       | GTTGCTGCAAAAGGGTGTGTATGCAGCTCCTCAGTAATAGTGTCTTACCCTGCCGTGTGTGAGATACAAGATGGTATAGTGTGG       |
| IBV_PLP.4  | Phosphate       | AATGAGGARGGTATTAAGGGTGTATGCAGCTCCTCAGTAATAGTGTCTTACCCTGCCGTGTGTGAGATATTTGGTATGACAAGATG     |
| IBV_PLP.5  | Phosphate       | AATGAGGARGGTATTAAGGGTGTATGCAGCTCCTCAGTAATAGTGTCTTACCCTGCCGTGTGTGAGATAAATTTGGTATGACAAGATG   |
| IBV_PLP.6  | Phosphate       | GTGTGGTTTCTGCAAAAGGGTGTATGCAGCTCCTCAGTAATAGTGTCTTACCCTGCCGTGTGTGAGATATAGCCAAGATGGTATA      |
| IBV_PLP.7  | Phosphate       | GTGTGGTTTCTGCAAAAGGGTGTATGCAGCTCCTCAGTAATAGTGTCTTACCCTGCCGTGTGTGAGATATAGCCAAGATGGTATA      |
| IBV_PLP.8  | Phosphate       | TTTTGGAAGTAGAGTACGGTGTATGCAGCTCCTCAGTAATAGTGTCTTACCCTGCCGTGTGTGAGATATAGTACCATGCTGTGTCT     |
| IBV_PLP.9  | Phosphate       | CGTACTAAAGTAAAGGGTGTATGCAGCTCCTCAGTAATAGTGTCTTACCCTGCCGTGTGTGAGATATTGATAAAGTTTTGGCCCT      |
| IBV_PLP.10 | Phosphate       | CCTGATAATGAAATCTTAAAGTGTATGCAGCTCCTCAGTAATAGTGTCTTACCCTGCCGTGTGTGAGATATTGATAAAGTTTGGGTT    |
| IBV_PLP.11 | Phosphate       | GACCTGAATTTGGGGTATTGTGTATGCAGCTCCTCAGTAATAGTGTCTTACCCTGCCGTGTGTGAGATAAACAGGACAGCCGCT       |
| AIV_PLP.1  | Phosphate       | CRCTGGGCACGGTGTGTATGCAGCTCCTCAGTAATAGTGTCTTACAATCAGTCATACGAGCCGCTGCAGTCCYCYT               |

## SI, ST3. Concentrations of cDNA samples used for assay optimization.

| Primer and cDNA conditions | RP         | SSP         | SP mix     | RP + SP mix |
|----------------------------|------------|-------------|------------|-------------|
| Genotype IV_Herts/33       | 3.8 ng/μL  | 0.800 ng/μL | 3.16 ng/μL | 4.64 ng/μL  |
| Genotype VII_HU-14036/06   | 7.00 ng/μL | 4.60 ng/μL  | 8.20 ng/μL | 12.3 ng/μL  |

**SI, ST4.** List and details of viral strains used in the study.

|                        | Strain Name                   | Genotype /virus | NCBI     | Virulence* | cDNA (ng/ $\mu$ l) | Copy number/ $\mu$ l | Provider                         |
|------------------------|-------------------------------|-----------------|----------|------------|--------------------|----------------------|----------------------------------|
| <b>BATCH-I</b>         | HK-99                         | I               | EU604269 | L          | 1.87               |                      | SVA<br>(Sweden)                  |
|                        | B1                            | II              | AF309418 | L          | 4.40               |                      |                                  |
|                        | Herts/33                      | IV              | FJ687487 | V          | 3.8                |                      |                                  |
|                        | PE-8                          | V               | EU604263 | V          | 1.62               |                      |                                  |
|                        | IQ-218                        | VI              | EU604254 | M          | 3.70               |                      |                                  |
|                        | BG-31                         | VII             | EU604250 | V          | 5.16               |                      |                                  |
|                        | IT-147                        | VIII            | EU604262 | V          | 3.18               |                      |                                  |
|                        |                               |                 |          |            |                    |                      |                                  |
| <b>BATCH-II</b>        | Ulster 2C                     | I               | AY562991 | L          |                    | 10 <sup>4</sup>      | NEBIH<br>(Hungary)               |
|                        | La Sota                       | II              | AJ629062 | L          |                    | 10 <sup>5</sup>      |                                  |
|                        | Ph/80                         | III             | FJ687488 | M          |                    | 10 <sup>4</sup>      |                                  |
|                        | Herts/33                      | IV              | FJ687487 | V          |                    | 10 <sup>5</sup>      |                                  |
|                        | HU-206/81                     | V               | -        | V          |                    | 10 <sup>5</sup>      |                                  |
|                        | HU-202/16**                   | VI              | -        | M          |                    | 10 <sup>5</sup>      |                                  |
|                        | HU-14036/06                   | VII             | -        | V          |                    | 10 <sup>4</sup>      |                                  |
|                        | IT-147/94                     | VIII            | EU604262 | V          |                    | 10 <sup>4</sup>      |                                  |
| <b>Non-NDV strains</b> | Cevac LT L                    | ILTV            | -        |            |                    | 10 <sup>4</sup>      | NEBIH<br>(Hungary)               |
|                        | Hipragumboro-CH/80            | IBDV            | -        |            |                    | 10 <sup>6</sup>      |                                  |
|                        | 11518/10                      | IBV             | -        |            |                    | 10 <sup>7</sup>      |                                  |
|                        | A/duck/Hungary/5              | AIV             | -        |            |                    | 10 <sup>6</sup>      |                                  |
|                        | 4494/16 (H5N8)                |                 |          |            |                    |                      |                                  |
|                        | B/Stockholm/5/2014 (Victoria) | Influenza B     | -        |            |                    | 2x10 <sup>4</sup>    | Karolinska institute<br>(Sweden) |

\* L: Lentogenic M: Mesogenic V: Velogenic  
\*\* PPMV-1: Pigeon paramyxovirus type 1  
(<https://www.ncbi.nlm.nih.gov/pmc/articles/PMC2566108/>)
